# Supplementary material
Source: PubMed Central journal article supplement (PMC5949722)
Supplement: jm7b00574_si_001.pdf [file jm7b00574_si_001.pdf]

# Supporting Information

## Modulators of 14-3-3 Protein-Protein Interactions

Loes M. Stevers<sup>a</sup>, Eline Sijbesma<sup>a</sup>, Maurizio Botta<sup>b</sup>, Carol MacKintosh<sup>c</sup>, Tomas Obsil<sup>d</sup>, Isabelle Landrieu<sup>e</sup>, Ylenia Cau<sup>b</sup>, Andrew J. Wilson<sup>f,g</sup>, Anna Karawajczyk<sup>h</sup>, Jan Eickhoff<sup>i</sup>, Jeremy Davis<sup>j</sup>, Michael Hann<sup>k</sup>, Gavin O'Mahony<sup>l</sup>, Richard G. Doveston<sup>a</sup>, Luc Brunsveld<sup>a</sup>, Christian Ottmann<sup>a,m\*</sup>

<sup>a</sup> *Laboratory of Chemical Biology, Department of Biomedical Engineering and Institute for Complex Molecular Systems (ICMS), Eindhoven University of Technology, P.O. Box 513, 5600 MB Eindhoven, the Netherlands.*

*Email: [c.ottmann@tue.nl](mailto:c.ottmann@tue.nl)*

*Tel.: +31 40-247 2835*

<sup>b</sup> *Department of Biotechnology, Chemistry and Pharmacy, University of Siena, Via Aldo Moro 2, 53100, Siena, Italy.*

<sup>c</sup> *Division of Cell and Developmental Biology, School of Life Sciences, University of Dundee, Dundee, United Kingdom.*

<sup>d</sup> *Department of Physical and Macromolecular Chemistry, Faculty of Science, Charles University, Prague, Czech Republic.*

<sup>e</sup> *Université de Lille, CNRS, UMR 8576, F 59 000 Lille, France.*

<sup>f</sup> *School of Chemistry, University of Leeds, Woodhouse Lane, Leeds LS2 9JT, UK.*

<sup>g</sup> *Astbury Center For Structural Molecular Biology, University of Leeds, Woodhouse Lane, Leeds LS2 9JT, UK.*

<sup>h</sup> *Taros Chemicals GmbH & Co. KG, Dortmund, Germany.*

<sup>i</sup> *Lead Discovery Center GmbH, Dortmund, Germany.*

<sup>j</sup> *UCB Celltech, 216 Bath Road, Slough SL1 3WE, UK.*

<sup>k</sup> *GlaxoSmithKline, Gunnels Wood Road, Stevenage, Hertfordshire SG1 2NY, UK.*

<sup>l</sup> *Cardiovascular and Metabolic Diseases, Innovative Medicines and Early Development Biotech Unit, AstraZeneca Gothenburg, Pepparedsleden 1, SE-431 83 Mölndal, Sweden.*

<sup>m</sup> *Department of Chemistry, University of Duisburg-Essen, Universitätsstr. 7, 45141, Essen, Germany.*

## Contents

|                                                                          |   |
|--------------------------------------------------------------------------|---|
| Table of 14-3-3 crystal structures deposited in the PDB (July 2017)..... | 2 |
|--------------------------------------------------------------------------|---|

## 14-3-3 crystal structures (July 2017)

| PDB ID | Name                  | Resolution | Isoform   | Organism               | Ligand       | Ref.                                      |
|--------|-----------------------|------------|-----------|------------------------|--------------|-------------------------------------------|
| 1A37   | 14-3-3ζ/C-RafpS259    | 3.60 Å     | Zeta      | Human                  | -            | Liddington, RC et al. (1998) <sup>1</sup> |
| 1A38   | 14-3-3ζ/R18           | 3.35 Å     | Zeta      | Human                  | -            | Liddington, RC et al. (1998) <sup>1</sup> |
| 1A40   | 14-3-3ζ               | 2.80 Å     | Zeta      | Human                  | -            | Liddington, RC et al. (1995) <sup>2</sup> |
| 1QJA   | 14-3-3ζ/MODE2         | 2.00 Å     | Zeta      | Human                  | -            | Yaffe, MB et al. (1999) <sup>3</sup>      |
| 1QJB   | 14-3-3ζ/MODE1         | 2.00 Å     | Zeta      | Human                  | -            | Yaffe, MB et al. (1999) <sup>3</sup>      |
| 1IB1   | 14-3-3ζ/AANAT         | 2.60 Å     | Zeta      | Human                  | -            | Dyda, F et al. (2001) <sup>4</sup>        |
| 1O9C   | T14-3c                | 2.60 Å     | Isoform c | Tobacco                | Citrate      | Oecking, C. et al. (2003) <sup>5</sup>    |
| 1O9D   | T14-3c/PMA2pS955      | 2.30 Å     | Isoform c | Tobacco                | -            | Oecking, C. et al. (2003) <sup>5</sup>    |
| 1O9E   | T14-3c/FC-A           | 2.60 Å     | Isoform c | Tobacco                | Fusicoccin A | Oecking, C. et al. (2003) <sup>5</sup>    |
| 1O9F   | T14-3c/PMA2pS955/FC-A | 2.70 Å     | Isoform c | Tobacco                | Fusicoccin A | Oecking, C. et al. (2003) <sup>5</sup>    |
| 1YWT   | 14-3-3σ/MODE1         | 2.40 Å     | Sigma     | Human                  | -            | Yaffe, MB. et al. (2005) <sup>6</sup>     |
| 1YZ5   | 14-3-3σ               | 2.80 Å     | Sigma     | Human                  | -            | Hermeking, H. et al. (2005) <sup>7</sup>  |
| 2BQ0   | 14-3-3β               | 2.50 Å     | Beta      | Human                  | -            | Doyle, DA. et al. (2006) <sup>8</sup>     |
| 2BR9   | 14-3-3ε/ConsPep       | 1.75 Å     | Epsilon   | Human                  | -            | Doyle, DA. et al. (2006) <sup>8</sup>     |
| 2BTP   | 14-3-3τ/ConsPep       | 2.80 Å     | Tau       | Human                  | -            | Doyle, DA. et al. (2006) <sup>8</sup>     |
| 2C23   | 14-3-3β/ExoS          | 2.65 Å     | Beta      | Human                  | -            | Doyle, DA. et al. (2006) <sup>8</sup>     |
| 2C63   | 14-3-3η/ConsPep       | 2.15 Å     | Eta       | Human                  | -            | Doyle, DA. et al. (2006) <sup>8</sup>     |
| 2C74   | 14-3-3 η/ConsPep      | 2.70 Å     | Eta       | Human                  | -            | Doyle, DA. et al. (2006) <sup>8</sup>     |
| 2B05   | 14-3-3γ/MODE1         | 2.55 Å     | Gamma     | Human                  | -            | -                                         |
| 2C1J   | 14-3-3ζ/H3pS10K9Ac    | 2.60 Å     | Zeta      | Human                  | -            | Mahadevan, LC. et al. (2005) <sup>9</sup> |
| 2C1N   | 14-3-3ζ/H3pS10        | 2.00 Å     | Zeta      | Human                  | -            | Mahadevan, LC. et al. (2005) <sup>9</sup> |
| 2NPM   | 14-3-3/ConsPep        | 2.52 Å     |           | Cryptosporidium parvum | -            | Hui, R. et al. (2011) <sup>10</sup>       |

|      |                                |        |           |                        |                |                                            |
|------|--------------------------------|--------|-----------|------------------------|----------------|--------------------------------------------|
| 2O8P | 14-3-3/ConsPep                 | 1.82 Å |           | Cryptosporidium parvum | -              | Hui, R. et al. (2011) <sup>10</sup>        |
| 3EFZ | 14-3-3/ConsPep                 | 2.08 Å |           | Cryptosporidium parvum | -              | Hui, R. et al. (2011) <sup>10</sup>        |
| 2O98 | T14-3c/PMA2_CT52               | 2.70 Å | Isoform c | Tobacco                | Fusicoccin A   | Oecking, C. et al. (2007) <sup>11</sup>    |
| 2O02 | 14-3-3ζ/ExoS                   | 1.50 Å | Zeta      | Human/P. aeruginosa    | -              | Hallberg, B. et al. (2007) <sup>12</sup>   |
| 2V7D | 14-3-3ζ/IntegBpT758            | 2.50 Å | Zeta      | Human                  | -              | Fagerholm, SC. et al. (2008) <sup>13</sup> |
| 3E6Y | T14-3c/PMA2_pT955/CN-A         | 2.50 Å | Isoform c | Tobacco                | Cotylenin A    | Ottmann, C. et al. (2009) <sup>14</sup>    |
| 3CU8 | 14-3-3ζ/C-RafpS259             | 2.40 Å | Zeta      | Human                  | -              | Ottmann, C. et al. (2010) <sup>15</sup>    |
| 3LW1 | 14-3-3σ/p53pT387               | 1.28 Å | Sigma     | Human                  | -              | Ottmann, C. et al. (2010) <sup>15</sup>    |
| 3M50 | T14-3e/PMA2_CT30/Epibestatin   | 2.60 Å | Isoform e | Nicotiana              | Epibestatin    | Ottmann, C. et al. (2010) <sup>15</sup>    |
| 3M51 | T14-3e/PMA2_CT30/Pyrrrolidone1 | 3.25 Å | Isoform e | Nicotiana              | Pyrrrolidone 1 | Ottmann, C. et al. (2010) <sup>15</sup>    |
| 3IQJ | 14-3-3σ/C-RafpS259 (10mer)     | 1.15 Å | Sigma     | Human                  | -              | Ottmann, C. et al. (2010) <sup>15</sup>    |
| 3IQU | 14-3-3σ/C-RafpS259 (6mer)      | 1.05 Å | Sigma     | Human                  | -              | Ottmann, C. et al. (2010) <sup>15</sup>    |
| 3IQV | 14-3-3σ/C-RafpS259 (6mer)/FC-A | 1.20 Å | Sigma     | Human                  | Fusicoccin A   | Ottmann, C. et al. (2010) <sup>15</sup>    |
| 2WH0 | 14-3-3ζ/PKCpS346pS368          | 2.25 Å | Zeta      | Human                  | -              | McDonald, NQ. et al. (2009) <sup>16</sup>  |
| 3MHR | 14-3-3σ/YAPpS127               | 1.15 Å | Sigma     | Human                  | -              | Ottmann, C. et al. (2010) <sup>17</sup>    |
| 3NKX | 14-3-3ζ/C-RafpS259             | 2.40 Å | Zeta      | Human                  | -              | Ottmann, C. et al. (2010) <sup>18</sup>    |
| 3O8I | 14-3-3σ/C-RafpS259/fragment    | 2.00 Å | Sigma     | Human                  | fragment       | Ottmann, C. et al. (2010) <sup>18</sup>    |
| 3AXY | GF-14c/Hd3a/OsFD1              | 2.40 Å | Isoform c | Rice                   | -              | Shimamoto, K. et al. (2011) <sup>19</sup>  |
| 3RDH | 14-3-3ζ/FOBISIN101             | 2.40 Å | Zeta      | Human                  | FOBISIN101     | Fu, H. et al. (2011) <sup>20</sup>         |
| 3P1N | 14-3-3σ/TASK3pS373             | 1.40 Å | Sigma     | Human                  | -              | Ottmann, C. et al. (2013) <sup>21</sup>    |
| 3P1O | 14-3-3σ/TASK3pS373/FC-A        | 1.90 Å | Sigma     | Human                  | Fusicoccin A   | Ottmann, C. et al. (2013) <sup>21</sup>    |
| 3P1P | 14-3-3σC38N_N166H/TASK3pS373   | 1.90 Å | Sigma     | Human                  | -              | Ottmann, C. et al. (2013) <sup>21</sup>    |

|      |                                                     |        |           |         |                        |                                         |
|------|-----------------------------------------------------|--------|-----------|---------|------------------------|-----------------------------------------|
| 3P1Q | 14-3-3 $\sigma$ C38N_N166H/TASK3pS373/FC-A          | 1.70 Å | Sigma     | Human   | Fusicoccin A           | Ottmann, C. et al. (2013) <sup>21</sup> |
| 3P1R | 14-3-3 $\sigma$ C38V_N166H/TASK3pS373               | 1.70 Å | Sigma     | Human   | -                      | Ottmann, C. et al. (2013) <sup>21</sup> |
| 3P1S | 14-3-3 $\sigma$ C38V_N166H/TASK3pS373/FC-A          | 1.65 Å | Sigma     | Human   | Fusicoccin A           | Ottmann, C. et al. (2013) <sup>21</sup> |
| 3UAL | 14-3-3 $\epsilon$ /MLF1pS34                         | 1.80 Å | Epsilon   | Human   | -                      | Ottmann, C. et al. (2012) <sup>22</sup> |
| 3UBW | 14-3-3 $\epsilon$ /MLF1pS34/fragment                | 1.90 Å | Epsilon   | Human   | fragment               | Ottmann, C. et al. (2012) <sup>22</sup> |
| 4DNK | 14-3-3 $\beta$                                      | 2.20 Å | Beta      | Human   | phosphate              | -                                       |
| 3UZD | 14-3-3 $\gamma$ /HDAC4pS350                         | 1.86 Å | Gamma     | Human   | -                      | Min, J. et al. (2012) <sup>23</sup>     |
| 4E2E | 14-3-3 $\gamma$ /HDAC4pS350                         | 2.25 Å | Gamma     | Human   | -                      | -                                       |
| 3U9X | 14-3-3 $\sigma$ /pyridoxalPD                        | 1.80 Å | Sigma     | Human   | Pyridoxal-P-derivative | Ottmann, C. et al. (2012) <sup>24</sup> |
| 4DX0 | T14-3 $\epsilon$ /PMA2_CT30/pyrazole                | 3.40 Å | Isoform e | Tobacco | Pyrazole               | Ottmann, C. et al. (2012) <sup>25</sup> |
| 4DAT | 14-3-3 $\sigma$ /PADI6pS446                         | 1.40 Å | Sigma     | Human   | -                      | Ottmann, C. et al. (2012) <sup>26</sup> |
| 4DAU | 14-3-3 $\sigma$ /PADI6pS10                          | 2.20 Å | Sigma     | Human   | -                      | Ottmann, C. et al. (2012) <sup>26</sup> |
| 3SPR | 14-3-3 $\sigma$ C38V_N166H/TASK3pS373/FC-THF        | 1.99 Å | Sigma     | Human   | Fusicoccin THF         | Ottmann, C. et al. (2013) <sup>21</sup> |
| 3SMK | 14-3-3 $\sigma$ C38V_N166H/TASK3pS373/CN-A          | 2.10 Å | Sigma     | Human   | Cotlenin A             | Ottmann, C. et al. (2013) <sup>21</sup> |
| 3SML | 14-3-3 $\sigma$ C38N_N166H/TASK3pS373/FC-A aglycone | 1.90 Å | Sigma     | Human   | Fusicoccin A aglycone  | Ottmann, C. et al. (2013) <sup>21</sup> |
| 3SMM | 14-3-3 $\sigma$ C38N_N166H/TASK3pS373/FC-J aglycone | 2.00 Å | Sigma     | Human   | Fusicoccin J aglycone  | Ottmann, C. et al. (2013) <sup>21</sup> |
| 3SMN | 14-3-3 $\sigma$ C38N_N166H/TASK3pS373/FC THF        | 2.00 Å | Sigma     | Human   | Fusicoccin THF         | Ottmann, C. et al. (2013) <sup>21</sup> |
| 3SMO | 14-3-3 $\sigma$ C38V_N166H/TASK3pS373/FC-J aglycone | 1.80 Å | Sigma     | Human   | Fusicoccin J aglycone  | Ottmann, C. et al. (2013) <sup>21</sup> |
| 3UX0 | 14-3-3 $\sigma$ /TASK3pS373/FC-H                    | 1.75 Å | Sigma     | Human   | Fusicoccin H           | Ottmann, C. et al. (2013) <sup>21</sup> |
| 4FR3 | 14-3-3 $\sigma$ /TASK3pS373/FC-H derivative         | 1.90 Å | Sigma     | Human   | 16-O-Me-Fusicoccin H   | Ottmann, C. et al. (2013) <sup>21</sup> |
| 3SP5 | 14-3-3 $\sigma$ /TASK3pS373/Cotlenol                | 1.80 Å | Sigma     | Human   | Cotlenol               | Ottmann, C. et al. (2013) <sup>21</sup> |

|      |                                      |        |       |                      |                 |                                           |
|------|--------------------------------------|--------|-------|----------------------|-----------------|-------------------------------------------|
| 4FJ3 | 14-3-3 $\zeta$ /C-RafpS233pS259      | 1.95 Å | Zeta  | Human                | -               | Ottmann, C. et al. (2012) <sup>27</sup>   |
| 4GNT | 14-3-3 $\beta$ /ChREBP               | 2.41 Å | Beta  | Human                | -               | Uyeda, K. et al. (2012) <sup>28</sup>     |
| 3TOL | 14-3-3 $\sigma$ /inhibitor           | 1.60 Å | Sigma | Human                | Phosphonate B5  | Ottmann, C. et al. (2013) <sup>29</sup>   |
| 3TOM | 14-3-3 $\sigma$ /inhibitor           | 1.75 Å | Sigma | Human                | Phosphonate B8  | Ottmann, C. et al. (2013) <sup>29</sup>   |
| 4DHM | 14-3-3 $\sigma$ /inhibitor           | 1.70 Å | Sigma | Human                | Phosphonate B11 | Ottmann, C. et al. (2013) <sup>29</sup>   |
| 4DHN | 14-3-3 $\sigma$ /inhibitor           | 1.80 Å | Sigma | Human                | Phosphonate B10 | Ottmann, C. et al. (2013) <sup>29</sup>   |
| 4DHO | 14-3-3 $\sigma$ /inhibitor           | 1.70 Å | Sigma | Human                | Phosphonate B9  | Ottmann, C. et al. (2013) <sup>29</sup>   |
| 4DHP | 14-3-3 $\sigma$ /inhibitor           | 1.75 Å | Sigma | Human                | Phosphonate B7  | Ottmann, C. et al. (2013) <sup>29</sup>   |
| 4DHQ | 14-3-3 $\sigma$ /inhibitor           | 1.75 Å | Sigma | Human                | Phosphonate B6  | Ottmann, C. et al. (2013) <sup>29</sup>   |
| 4DHR | 14-3-3 $\sigma$ /inhibitor           | 1.40 Å | Sigma | Human                | Phosphonate B4  | Ottmann, C. et al. (2013) <sup>29</sup>   |
| 4DHS | 14-3-3 $\sigma$ /inhibitor           | 1.74 Å | Sigma | Human                | Phosphonate B3  | Ottmann, C. et al. (2013) <sup>29</sup>   |
| 4DHT | 14-3-3 $\sigma$ /inhibitor           | 1.80 Å | Sigma | Human                | Phosphonate B2  | Ottmann, C. et al. (2013) <sup>29</sup>   |
| 4DHU | 14-3-3 $\sigma$ /inhibitor           | 1.67 Å | Sigma | Human                | Phosphonate B1  | Ottmann, C. et al. (2013) <sup>29</sup>   |
| 4HQW | 14-3-3 $\sigma$ /molecular tweezer   | 2.35 Å | Sigma | Human                | CLR01           | Ottmann, C. et al. (2013) <sup>30</sup>   |
| 4HRU | 14-3-3 $\sigma$ /molecular tweezer   | 3.15 Å | Sigma | Human                | CLR01           | Ottmann, C. et al. (2013) <sup>30</sup>   |
| 4JC3 | 14-3-3 $\sigma$ /ERapT594            | 2.05 Å | Sigma | Human                | -               | Ottmann, C. et al. (2013) <sup>31</sup>   |
| 4JDD | 14-3-3 $\sigma$ /ERapT594/FC-A       | 2.10 Å | Sigma | Human                | Fusicoccin A    | Ottmann, C. et al. (2013) <sup>31</sup>   |
| 4F7R | g14-3-3                              | 3.20 Å | -     | Giardia intestinalis | Phosphate       | Lalle, M. et al. (2014) <sup>32</sup>     |
| 4BG6 | 14-3-3 $\zeta$ /Rnd3pS240            | 2.30 Å | Zeta  | Human                | -               | Ridley, AJ. et al. (2013) <sup>33</sup>   |
| 4HKC | 14-3-3 $\zeta$ /α4pS1011             | 2.20 Å | Zeta  | Human                | -               | Campbell, ID. et al. (2013) <sup>34</sup> |
| 4IEA | 14-3-3 $\sigma$ /C-RafpS629          | 1.70 Å | Sigma | Human                | -               | Ottmann, C. et al. (2013) <sup>35</sup>   |
| 4IHL | 14-3-3 $\zeta$ /C-RafpS233pS259/CN-A | 2.20 Å | Zeta  | Human                | -               | Ottmann, C. et al. (2013) <sup>35</sup>   |
| 4J6S | 14-3-3 $\gamma$ /THpS19              | 3.08 Å | Gamma | Human                | -               | Martinez, A. et al. (2014) <sup>36</sup>  |
| 4FL5 | 14-3-3 $\sigma$ /TaupS214            | 1.90 Å | Sigma | Human                | -               | Ottmann, C. et al. (2015) <sup>37</sup>   |
| 5BTV | 14-3-3 $\sigma$ /TaupS324            | 1.90 Å | Sigma | Human                | -               | Ottmann, C. et al. (2015) <sup>37</sup>   |

|      |                             |        |       |                      |                         |                                            |
|------|-----------------------------|--------|-------|----------------------|-------------------------|--------------------------------------------|
| 4N7G | 14-3-3ζ/ExoS                | 2.25 Å | Zeta  | Human                | -                       | Ottmann, C. et al. (2014) <sup>38</sup>    |
| 4N7Y | 14-3-3ζ/ExoSDerPep          | 2.16 Å | Zeta  | Human                | βRS8                    | Ottmann, C. et al. (2014) <sup>38</sup>    |
| 4N84 | 14-3-3ζ/ExoSDerPep          | 2.50 Å | Zeta  | Human                | βSS12                   | Ottmann, C. et al. (2014) <sup>38</sup>    |
| 4O46 | 14-3-3γ/NS1pS228            | 2.90 Å | Gamma | Human/Influenza      |                         | Min, J. et al. (2014) <sup>39</sup>        |
| 4WRQ | 14-3-3ζ/ChibbypS20          | 2.41 Å | Zeta  | Human                | -                       | Choy et al. (2015) <sup>40</sup>           |
| 4QLI | 14-3-3σ/SnailpT177          | 1.45 Å | Sigma | Human                | -                       | -                                          |
| 4ZDR | 14-3-3ζ/LKB1                | 2.90 Å | Zeta  | Human                | -                       | Zhu, Y. et al. (2015) <sup>41</sup>        |
| 4Y32 | 14-3-3σ/Tau109B             | 1.70 Å | Sigma | Human                | Tau109B                 | Ottmann, C. et al. (2015) <sup>42</sup>    |
| 4Y3B | 14-3-3σ/Tau201D             | 1.80 Å | Sigma | Human                | Tau201D                 | Ottmann, C. et al. (2015) <sup>42</sup>    |
| 4Y5I | 14-3-3σ/Tau126B             | 1.40 Å | Sigma | Human                | Tau126B                 | Ottmann, C. et al. (2016) <sup>42</sup>    |
| 5D2D | 14-3-3ζ/CFTRpS753pS768      | 2.10 Å | Zeta  | Human                | -                       | Ottmann, C. et al. (2016) <sup>43</sup>    |
| 5D3E | 14-3-3γ/CFTRpS768pS795      | 2.75 Å | Gamma | Human                | -                       | Ottmann, C. et al. (2016) <sup>43</sup>    |
| 5D3F | 14-3-3ζ/CFTRpS753pS768/FC-A | 2.74 Å | Zeta  | Human                | Fusicoccin A            | Ottmann, C. et al. (2016) <sup>43</sup>    |
| 5F74 | 14-3-3β/ChREBP/AMP          | 2.35 Å | Beta  | Human                | Adenosine monophosphate | Uyeda, K. et al. (2012) <sup>44</sup>      |
| 5IQP | 14-3-3τ                     | 2.60 Å | Tau   | Human                | -                       | Gamblin, SJ. et al. (1995) <sup>45</sup>   |
| AZQ0 | g14-3-3/A8Ap                | 3.10 Å |       | Giardia intestinalis | -                       | Lalle, M. et al. (2015) <sup>46</sup>      |
| 5BY9 | g14-3-3 polygly             | 4.00 Å |       | Giardia intestinalis | -                       | Lalle, M. et al. (2015) <sup>46</sup>      |
| 5EWZ | 14-3-3ζ/Gab2pS210pT391      | 1.95 Å | Zeta  | Human                | -                       | Ottmann, C. et al. (2016) <sup>47</sup>    |
| 5EXA | 14-3-3ζ/Gab2pT391/ISIR-005  | 1.70 Å | Zeta  | Human                | ISIR-005                | Ottmann, C. et al. (2016) <sup>47</sup>    |
| 5J31 | 14-3-3ζ/ExoS derivative     | 2.40 Å | Zeta  | Human/P. aeruginosa  | Peptide H               | Grossmann, TN. et al. (2016) <sup>48</sup> |
| 5LTW | 14-3-3σ/HSPB6               | 4.50 Å | Sigma | Human                | -                       | Strelkov, SV. et al. (2017) <sup>49</sup>  |
| 5LU1 | 14-3-3σ/HSPB6pS16 (8mer)    | 2.40 Å | Sigma | Human                | -                       | Strelkov, SV. et al. (2017) <sup>49</sup>  |
| 5LU2 | 14-3-3σ/HSPB6pS16 (13mer)   | 2.50 Å | Sigma | Human                | -                       | Strelkov, SV. et al. (2017) <sup>49</sup>  |
| 5MY9 | 14-3-3σ/LRRK2pS935          | 1.33 Å | Sigma | Human                | -                       | Ottmann, C. et al. (2017) <sup>50</sup>    |
| 5MYC | 14-3-3σ/LRRK2pS910          | 1.46 Å | Sigma | Human                | -                       | Ottmann, C. et al. (2017) <sup>50</sup>    |

|          |                                          |        |       |       |                 |                                         |
|----------|------------------------------------------|--------|-------|-------|-----------------|-----------------------------------------|
| 5NAS     | 14-3-3 $\zeta$ /PI4KIIIbP294             | 2.08 Å | Zeta  | Human | -               | -                                       |
| 5WX<br>N | 14-3-3 $\zeta$ /LKB1pT336                | 2.93 Å | Zeta  | Human | -               | Wu, J. et al. (2017) <sup>51</sup>      |
| 5JIT     | 14-3-3 $\zeta$ /Cdc25pS216 (38mer)/CLR01 | 2.38 Å | Zeta  | Human | CLR01           | -                                       |
| 5JIV     | 14-3-3 $\zeta$ /Cdc25pS216 (38mer)/CLR01 | 2.45 Å | Zeta  | Human | CLR01           | -                                       |
| 5JM4     | 14-3-3 $\zeta$ /ExoS-adamantyl           | 2.34 Å | Zeta  | Human | ExoS-adamantyl  | -                                       |
| 5N10     | 14-3-3 $\zeta$ /FGG-ER $\beta$ /Q8       | 1.60 Å | Beta  | Human | Cucubit[8]Juril | Ottmann, C. et al. (2017) <sup>52</sup> |
| 5N75     | 14-3-3 $\sigma$ /TAZpS89                 | 1.80 Å | Sigma | Human | -               | Ottmann, C. et al. (2017) <sup>53</sup> |
| 5N5R     | 14-3-3 $\sigma$ /TAZpS89/NV1             | 1.80 Å | Sigma | Human | Fragment NV1    | Ottmann, C. et al. (2017) <sup>53</sup> |
| 5N5T     | 14-3-3 $\sigma$ /TAZpS89/NV2             | 1.80 Å | Sigma | Human | Fragment NV2    | Ottmann, C. et al. (2017) <sup>53</sup> |
| 5N5<br>W | 14-3-3 $\sigma$ /TAZpS89/NV2             | 1.37 Å | Sigma | Human | Fragment NV3    | Ottmann, C. et al. (2017) <sup>53</sup> |

1. Petosa C, Masters SC, Bankston LA, Pohl J, Wang B, Fu H, Liddington RC. 14-3-3zeta binds a phosphorylated Raf peptide and an unphosphorylated peptide via its conserved amphipathic groove. *J Biol Chem.* 1998 Jun 26;273(26):16305-10.
2. Liu D, Bienkowska J, Petosa C, Collier RJ, Fu H, Liddington R. Crystal structure of the zeta isoform of the 14-3-3 protein. *Nature.* 1995 Jul 13;376(6536):191-4.
3. Rittinger K, Budman J, Xu J, Volinia S, Cantley LC, Smerdon SJ, Gamblin SJ, Yaffe MB. Structural analysis of 14-3-3 phosphopeptide complexes identifies a dual role for the nuclear export signal of 14-3-3 in ligand binding. *Mol Cell.* 1999 Aug;4(2):153-66.
4. Obsil T, Ghirlando R, Klein DC, Ganguly S, Dyda F. Crystal structure of the 14-3-3zeta:serotonin N-acetyltransferase complex. a role for scaffolding in enzyme regulation. *Cell.* 2001 Apr 20;105(2):257-67.
5. Würtele M, Jelich-Ottmann C, Wittinghofer A, Oecking C. Structural view of a fungal toxin acting on a 14-3-3 regulatory complex. *EMBO J.* 2003 Mar 3;22(5):987-94.
6. Wilker EW, Grant RA, Artim SC, Yaffe MB. A structural basis for 14-3-3sigma functional specificity. *J Biol Chem.* 2005 May 13;280(19):18891-8.
7. Benzinger A, Popowicz GM, Joy JK, Majumdar S, Holak TA, Hermeking H. The crystal structure of the non-liganded 14-3-3sigma protein: insights into determinants of isoform specific ligand binding and dimerization.
8. Yang X, Lee WH, Sobott F, Papagrigoriou E, Robinson CV, Grossmann JG, Sundström M, Doyle DA, Elkins JM. Structural basis for protein-protein interactions in the 14-3-3 protein family. *Proc Natl Acad Sci U S A.* 2006 Nov 14;103(46):17237-42.

9. Macdonald N, Welburn JP, Noble ME, Nguyen A, Yaffe MB, Clynes D, Moggs JG, Orphanides G, Thomson S, Edmunds JW, Clayton AL, Endicott JA, Mahadevan LC. Molecular basis for the recognition of phosphorylated and phosphoacetylated histone h3 by 14-3-3. *Mol Cell*. 2005 Oct 28;20(2):199-211.
10. Brokx SJ, Wernimont AK, Dong A, Wasney GA, Lin YH, Lew J, Vedadi M, Lee WH, Hui R. Characterization of 14-3-3 proteins from *Cryptosporidium parvum*. *PLoS One*. 2011;6(8):e14827
11. Ottmann C, Marco S, Jaspert N, Marcon C, Schauer N, Weyand M, Vandermeeren C, Duby G, Boutry M, Wittinghofer A, Rigaud JL, Oecking C. Structure of a 14-3-3 coordinated hexamer of the plant plasma membrane H<sup>+</sup>-ATPase by combining X-ray crystallography and electron cryomicroscopy. *Mol Cell*. 2007 Feb 9;25(3):427-40.
12. Ottmann C, Yasmin L, Weyand M, Veessenmeyer JL, Diaz MH, Palmer RH, Francis MS, Hauser AR, Wittinghofer A, Hallberg B. Phosphorylation-independent interaction between 14-3-3 and exoenzyme S: from structure to pathogenesis. *EMBO J*. 2007 Feb 7;26(3):902-13.
13. Takala H, Nurminen E, Nurmi SM, Aatonen M, Strandin T, Takatalo M, Kiema T, Gahmberg CG, Ylänen J, Fagerholm SC. Beta2 integrin phosphorylation on Thr758 acts as a molecular switch to regulate 14-3-3 and filamin binding. *Blood*. 2008 Sep 1;112(5):1853-62.
14. Ottmann C, Weyand M, Sassa T, Inoue T, Kato N, Wittinghofer A, Oecking C. A structural rationale for selective stabilization of anti-tumor interactions of 14-3-3 proteins by cotylenin A. *J Mol Biol*. 2009 Mar 6;386(4):913-9.
15. Molzan M, Schumacher B, Ottmann C, Baljuls A, Polzien L, Weyand M, Thiel P, Rose R, Rose M, Kuhenne P, Kaiser M, Rapp UR, Kuhlmann J, Ottmann C. Impaired binding of 14-3-3 to C-RAF in Noonan syndrome suggests new approaches in diseases with increased Ras signaling. *Mol Cell Biol*. 2010 Oct;30(19):4698-711.
16. Kosteletzky B, Saurin AT, Purkiss A, Parker PJ, McDonald NQ. Recognition of an intra-chain tandem 14-3-3 binding site within PKCepsilon. *EMBO Rep*. 2009 Sep;10(9):983-9.
17. Schumacher B, Skwarczynska M, Rose R, Ottmann C. Structure of a 14-3-3 $\sigma$ -YAP phosphopeptide complex at 1.15 Å resolution. *Acta Crystallogr Sect F Struct Biol Cryst Commun*. 2010 Sep 1;66(Pt 9):978-84.
18. Molzan M, Schumacher B, Ottmann C, Baljuls A, Polzien L, Weyand M, Thiel P, Rose R, Rose M, Kuhenne P, Kaiser M, Rapp UR, Kuhlmann J, Ottmann C. Impaired binding of 14-3-3 to C-RAF in Noonan syndrome suggests new approaches in diseases with increased Ras signaling. *Mol Cell Biol*. 2010 Oct;30(19):4698-711.
19. Taoka K, Ohki I, Tsuji H, Furuita K, Hayashi K, Yanase T, Yamaguchi M, Nakashima C, Purwestri YA, Tamaki S, Ogaki Y, Shimada C, Nakagawa A, Kojima C, Shimamoto K. 14-3-3 proteins act as intracellular receptors for rice Hd3a florigen. *Nature*. 2011 Jul 31;476(7360):332-5.
20. Zhao J, Du Y, Horton JR, Upadhyay AK, Lou B, Bai Y, Zhang X, Du L, Li M, Wang B, Zhang L, Barbieri JT, Khuri FR, Cheng X, Fu H. Discovery and structural characterization of a small molecule 14-3-3 protein-protein interaction inhibitor. *Proc Natl Acad Sci U S A*. 2011 Sep 27;108(39):16212-6.



21. Anders C, Higuchi Y, Koschinsky K, Bartel M, Schumacher B, Thiel P, Nitta H, Preisig-Müller R, Schlichthörl G, Renigunta V, Ohkanda J, Daut J, Kato N, Ottmann C. A semisynthetic fusicoccane stabilizes a protein-protein interaction and enhances the expression of K<sup>+</sup> channels at the cell surface. *Chem Biol.* 2013 Apr 18;20(4):583-93.
22. Molzan M, Weyand M, Rose R, Ottmann C. Structural insights of the MLF1/14-3-3 interaction. *FEBS J.* 2012 Feb;279(4):563-71.
23. Xu C, Jin J, Bian C, Lam R, Tian R, Weist R, You L, Nie J, Bochkarev A, Tempel W, Tan CS, Wasney GA, Vedadi M, Gish GD, Arrowsmith CH, Pawson T, Yang XJ, Min J Sequence-specific recognition of a PxLPxI/L motif by an ankyrin repeat tumbler lock. *Sci Signal.* 2012 May 29;5(226):ra39.
24. Röglin L, Thiel P, Kohlbacher O, Ottmann C. Covalent attachment of pyridoxal-phosphate derivatives to 14-3-3 proteins. *Proc Natl Acad Sci U S A.* 2012 May 1;109(18):E1051-3
25. Richter A, Rose R, Hedberg C, Waldmann H, Ottmann C. An optimised small-molecule stabiliser of the 14-3-3-PMA2 protein-protein interaction. *Chemistry.* 2012 May 21;18(21):6520-7.
26. Rose R, Rose M, Ottmann C. Identification and structural characterization of two 14-3-3 binding sites in the human peptidylarginine deiminase type VI. *J Struct Biol.* 2012 Oct;180(1):65-72.
27. Molzan M, Ottmann C. Synergistic binding of the phosphorylated S233- and S259-binding sites of C-RAF to one 14-3-3 $\zeta$  dimer. *J Mol Biol.* 2012 Nov 2;423(4):486-95.
28. Ge Q, Huang N, Wynn RM, Li Y, Du X, Miller B, Zhang H, Uyeda K. Structural characterization of a unique interface between carbohydrate response element-binding protein (ChREBP) and 14-3-3 $\beta$  protein. *J Biol Chem.* 2012 Dec 7;287(50):41914-21.
29. Thiel P, Röglin L, Meissner N, Hennig S, Kohlbacher O, Ottmann C. Virtual screening and experimental validation reveal novel small-molecule inhibitors of 14-3-3 protein-protein interactions. *Chem Commun (Camb).* 2013 Oct 4;49(76):8468-70.
30. Bier D, Rose R, Bravo-Rodriguez K, Bartel M, Ramirez-Anguila JM, Dutt S, Wilch C, Klärner FG, Sanchez-Garcia E, Schrader T, Ottmann C. Molecular tweezers modulate 14-3-3 protein-protein interactions. *Nat Chem.* 2013 Mar;5(3):234-9.
31. De Vries-van Leeuwen IJ, da Costa Pereira D, Flach KD, Piersma SR, Haase C, Bier D, Yalcin Z, Michalides R, Feenstra KA, Jiménez CR, de Greef TF, Brunsveld L, Ottmann C, Zwart W, de Boer AH. Interaction of 14-3-3 proteins with the estrogen receptor alpha F domain provides a drug target interface. *Proc Natl Acad Sci U S A.* 2013 May 28;110(22):8894-9.
32. Fiorillo A, di Marino D, Bertuccini L, Via A, Pozio E, Camerini S, Ilari A, Lalle M. The crystal structure of *Giardia duodenalis* 14-3-3 in the apo form: when protein post-translational modifications make the difference. *PLoS One.* 2014 Mar 21;9(3):e92902.
33. Riou P, Kjær S, Garg R, Purkiss A, George R, Cain RJ, Bineva G, Reymond N, McColl B, Thompson AJ, O'Reilly N, McDonald NQ, Parker PJ, Ridley AJ. 14-3-3 proteins interact with a hybrid prenyl-phosphorylation motif to inhibit G proteins. *Cell.* 2013 Apr 25;153(3):640-53.

34. Bonet R, Vakonakis I, Campbell ID. Characterization of 14-3-3- $\zeta$  Interactions with integrin tails. *J Mol Biol.* 2013 Sep 9;425(17):3060-72.
35. Molzan M, Kasper S, Röglin L, Skwarczynska M, Sassa T, Inoue T, Breitenbuecher F, Ohkanda J, Kato N, Schuler M, Ottmann C. Stabilization of physical RAF/14-3-3 interaction by cotylenin A as treatment strategy for RAS mutant cancers. *ACS Chem Biol.* 2013 Sep 20;8(9):1869-75.
36. Skjervek AA, Mileni M, Baumann A, Halskau O, Teigen K, Stevens RC, Martinez A. The N-terminal sequence of tyrosine hydroxylase is a conformationally versatile motif that binds 14-3-3 proteins and membranes. *J Mol Biol.* 2014 Jan 9;426(1):150-68.
37. Joo Y, Schumacher B, Landrieu I, Bartel M, Smet-Nocca C, Jang A, Choi HS, Jeon NL, Chang KA, Kim HS, Ottmann C, Suh YH. Involvement of 14-3-3 in tubulin instability and impaired axon development is mediated by Tau. *FASEB J.* 2015 Oct;29(10):4133-44.
38. Glas A, Bier D, Hahne G, Rademacher C, Ottmann C, Grossmann TN. Constrained peptides with target-adapted cross-links as inhibitors of a pathogenic protein-protein interaction. *Angew Chem Int Ed Engl.* 2014 Feb 24;53(9):2489-93.
39. Qin S, Liu Y, Tempel W, Eram MS, Bian C, Liu K, Senisterra G, Crombet L, Vedadi M, Min J. Structural basis for histone mimicry and hijacking of host proteins by influenza virus protein NS1. *Nat Commun.* 2014 May 23;5:3952
40. Killoran RC, Fan J, Yang D, Shilton BH, Choy WY. Structural Analysis of the 14-3-3 $\zeta$ /Chibby Interaction Involved in Wnt/ $\beta$ -Catenin Signaling. *PLoS One.* 2015 Apr 24;10(4):e0123934.
41. Ding S, Zhou R, Zhu Y. Structure of the 14-3-3 $\zeta$ -LKB1 fusion protein provides insight into a novel ligand-binding mode of 14-3-3. *Acta Crystallogr F Struct Biol Commun.* 2015 Sep;71(Pt 9):1114-9.
42. Milroy LG, Bartel M, Henen MA, Leysen S, Adriaans JM, Brunsveld L, Landrieu I, Ottmann C. Stabilizer-Guided Inhibition of Protein-Protein Interactions. *Angew Chem Int Ed Engl.* 2015 Dec 21;54(52):15720-4.
43. Stevers LM, Lam CV, Leysen SF, Meijer FA, van Scheppingen DS, de Vries RM, Carlile GW, Milroy LG, Thomas DY, Brunsveld L, Ottmann C. Characterization and small-molecule stabilization of the multisite tandem binding between 14-3-3 and the R domain of CFTR. *Proc Natl Acad Sci U S A.* 2016 Mar 1;113(9):E1152-61.
44. Sato S, Jung H, Nakagawa T, Pawlosky R, Takeshima T, Lee WR, Sakiyama H, Laxman S, Wynn RM, Tu BP, MacMillan JB, De Brabander JK, Veech RL, Uyeda K. Metabolite Regulation of Nuclear Localization of Carbohydrate-response Element-binding Protein (ChREBP): ROLE OF AMP AS AN ALLOSTERIC INHIBITOR. *J Biol Chem.* 2016 May 13;291(20):10515-27.
45. Xiao B, Smerdon SJ, Jones DH, Dodson GG, Soneji Y, Aitken A, Gamblin SJ. Structure of a 14-3-3 protein and implications for coordination of multiple signalling pathways. *Nature.* 1995 Jul 13;376(6536):188-91.
46. Cau Y, Fiorillo A, Mori M, Ilari A, Botta M, Lalle M. Molecular Dynamics Simulations and Structural Analysis of *Giardia duodenalis* 14-3-3 Protein-Protein Interactions. *J Chem Inf Model.* 2015 Dec 28;55(12):2611-22.

47. Bier D, Bartel M, Sies K, Halbach S, Higuchi Y, Haranosono Y, Brummer T, Kato N, Ottmann C. Small-Molecule Stabilization of the 14-3-3/Gab2 Protein-Protein Interaction (PPI) Interface. *ChemMedChem*. 2016 Apr 19;11(8):911-8.
48. Cromm PM, Wallraven K, Glas A, Bier D, Fürstner A, Ottmann C, Grossmann TN. Constraining an Irregular Peptide Secondary Structure through Ring-Closing Alkyne Metathesis. *Chembiochem*. 2016 Oct 17;17(20):1915-1919.
49. Sluchanko NN, Beelen S, Kulikova AA, Weeks SD, Antson AA, Gusev NB, Strelkov SV. Structural Basis for the Interaction of a Human Small Heat Shock Protein with the 14-3-3 Universal Signaling Regulator. *Structure*. 2017 Feb 7;25(2):305-316.
50. Stevers LM, de Vries RM, Doveston RG, Milroy LG, Brunsveld L, Ottmann C. Structural interface between LRRK2 and 14-3-3 protein. *Biochem J*. 2017 Mar 23;474(7):1273-1287.
51. Lu Y, Ding S, Zhou R, Wu J. Structure of the complex of phosphorylated liver kinase B1 and 14-3-3 $\zeta$ . *Acta Crystallogr F Struct Biol Commun*. 2017 Apr 1;73(Pt 4):196-201.
52. de Vink PJ, Briels JM, Schrader T, Milroy LG, Brunsveld L, Ottmann C. A Binary Bivalent Supramolecular Assembly Platform Based on Cucurbit[8]uril and Dimeric Adapter Protein 14-3-3. *Angew Chem Int Ed Engl*. 2017 May 16.
53. Sijbesma E, Skora L, Leysen S, Brunsveld L, Koch U, Nussbaumer P, Jahnke W, Ottmann C. Identification of two secondary ligand binding sites in 14-3-3 proteins using fragment screening. *Biochemistry*. 2017 Jul 6. doi: 10.1021/acs.biochem.7b00153.
